# Supplementary material
Source: HighWire-hosted journal article supplement (http://www.cmaj.ca/highwire/filestream/68011/field_highwire_adjunct_files/5/170088-res-6-at.pdf)
Supplement: 170088-res-6-at.pdf [file 170088-res-6-at.pdf]

**Appendix 6 (as supplied by the authors):** Method of suicide presented as N (%) unless otherwise specified

| Method                   | Perinatal group<br>(N=51) | Non-perinatal group<br>(N=1,597) | P-value |
|--------------------------|---------------------------|----------------------------------|---------|
| <b>Method of Suicide</b> |                           |                                  | 0.036   |
| Hanging                  | 17 (33.3)                 | 451 (28.2)                       |         |
| Jump/fall                | 10 (19.6)                 | 212 (13.3)                       |         |
| Substance                | 7 (13.7)                  | 601 (37.6)                       |         |
| Other/ Asphyxiation      | NR*                       | 112 (7.0)                        |         |
| Drowning                 | NR                        | 48 (3.0)                         |         |
| Gun                      | NR                        | 41 (2.6)                         |         |
| Other                    | NR                        | 28 (1.8)                         |         |
| Fire/burns               | NR                        | 19 (1.2)                         |         |
| Missing                  | -                         | 6 (0.4)                          |         |

\*NR = not reportable due to small cell sizes, < 6
